# Supplementary material for: A novel LiCoPO4-coated core–shell structure for spinel LiNi0.5Mn1.5O4 as a high-performance cathode material for lithium-ion batteries
Source: Royal Society of Chemistry journal article supplement (doi:10.1039/c6ta08659d), 2016-11-28
Supplement: c6ta08659d1.pdf [file c6ta08659d1.pdf]

## Supporting Information

A Novel  $\text{LiCoPO}_4$ -coated Core-shell Structure for Spinel  
 $\text{LiNi}_{0.5}\text{Mn}_{1.5}\text{O}_4$  as a High-performance Cathode Material for  
Lithium-ion Batteries

Yang Liu,<sup>a,b</sup> Zhongpei Lu,<sup>a</sup> Chenfang Deng,<sup>a</sup> Jingjing Ding,<sup>a,b</sup> Yue Xu,<sup>a,b</sup> Xiaojun Lu,<sup>a</sup>  
Gang Yang,<sup>\*a,b</sup>

<sup>a</sup> Jiangsu Lab of Advanced Functional Material, Changshu Institute of Technology, Changshu, 215500,  
China

<sup>b</sup> School of Materials Science and Engineering, China University of Mining and Technology, Xuzhou,  
221116, China

**Table S-1.** Comparison of electrochemical performances between the current study and previous works concerning core-shell  $\text{LiNi}_{0.5}\text{Mn}_{1.5}\text{O}_4$  modified by other materials.

| Coating Material                            | Initial Discharge Capacity ( $\text{mAh g}^{-1}$ ) | Capacity Retention (%) | Rate Performance ( $\text{mAh g}^{-1}$ ) | References   |
|---------------------------------------------|----------------------------------------------------|------------------------|------------------------------------------|--------------|
| $\text{LiCoPO}_4$                           | 137                                                | 96.4 (100 cycles)      | 130 (20 C)                               | Current work |
| $\text{LiAlSiO}_4$                          | 131                                                | 94.3 (150 cycles)      | -                                        | [1]          |
| $\text{FePO}_4$                             | 112                                                | 95.5 (100 cycles)      | ~82 (5C)                                 | [2]          |
| Polypyrrole                                 | 112.9                                              | 91.0 (300 cycles)      | 85 (5C)                                  | [3]          |
| $\text{Fe}_2\text{O}_3$                     | 126                                                | 98.6 (100 cycles)      | ~100 (10 C)                              | [4]          |
| $\text{Al}_2\text{O}_3$                     | ~114                                               | ~93.0 (150 cycles)     | ~38 (4 C)                                | [5]          |
| Fluorination                                | 135                                                | 95.2 (50 cycles)       | -                                        | [6]          |
| $\text{LiPO}_3$                             | 130                                                | -                      | 110 (20 C)                               | [7]          |
| $\text{Li}_2\text{O}-2\text{B}_2\text{O}_3$ | 111                                                | 91.4 (100 cycles)      | 105.8 (10 C)                             | [8]          |
| $\text{RuO}_2$                              | 110                                                | 70.1 (1000 cycles)     | -                                        | [9]          |
| Trihydroxy benzene                          | 106                                                | 109 (200 cycles)       | -                                        | [10]         |
| $\text{Li}_4\text{Ti}_5\text{O}_{12}$       | 103                                                | ~58 (100 cycles)       | -                                        | [11]         |
| Al                                          | 135                                                | 96.1 (100 cycles)      | ~115 (2 C)                               | [12]         |
| C                                           | 125                                                | 71 (500 cycles)        | 104 (10 C)                               | [13]         |
| $\text{V}_2\text{O}_5$                      | 131.5                                              | 92.2 (100 cycles)      | 105.3 (10 C)                             | [14]         |
| $\text{AlF}_3$                              | 103.6                                              | 93.6 (100 cycles)      | -                                        | [15]         |
| $\text{MgF}_2$                              | 115.3                                              | 89.9 (100 cycles)      | -                                        | [16]         |
| Polyacrylate                                | 130                                                | 90.0 (200 cycles)      | 101.5 (12 C)                             | [17]         |

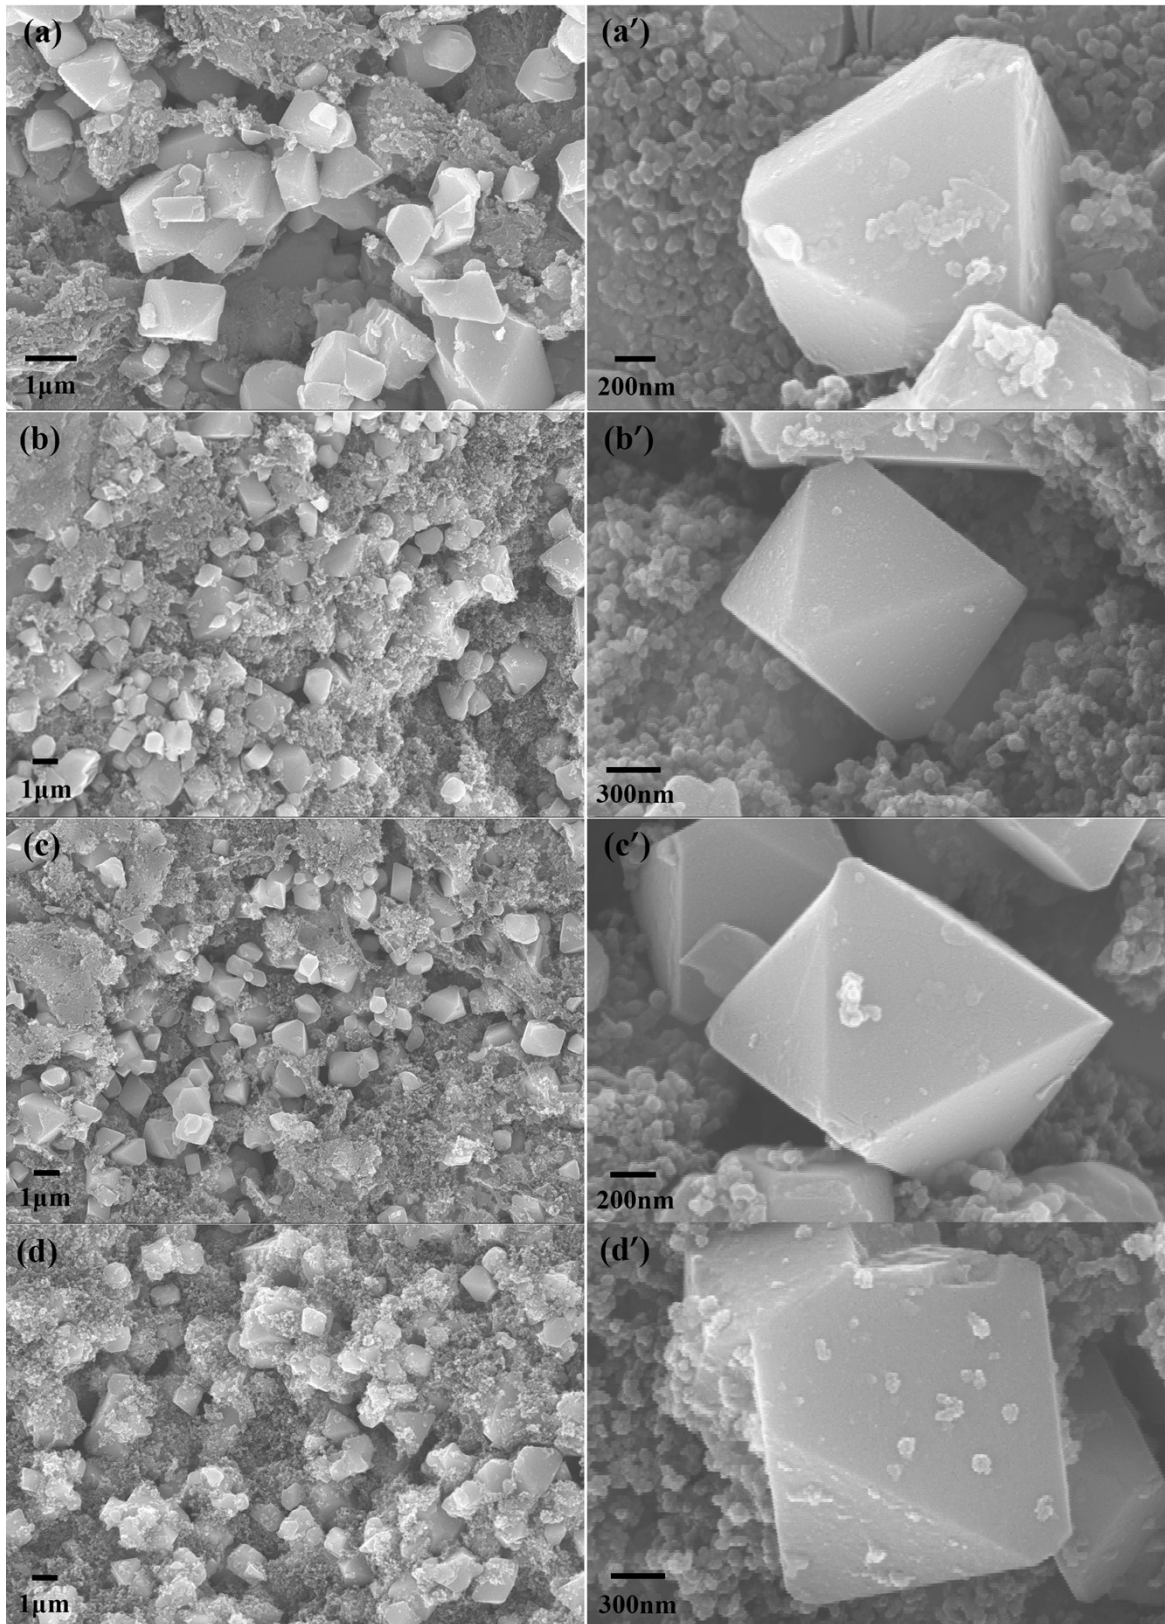

**Figure. S-1** SEM images of (a, a') NM-Pure, (b, b') NM-CP1, (c, c') NM-CP5 and (d, d') NM-CP10 cathode cycled at 0.5 C charging/discharging for 600 times.

## Reference

- [1] J. C. Deng, Y. L. Xu, L. Li, T. Y. Feng and L. Li, Microporous LiAlSiO<sub>4</sub> with high ionic conductivity working as a coating material and water adsorbent for LiNi<sub>0.5</sub>Mn<sub>1.5</sub>O<sub>4</sub> cathode, *J. Mater. Chem. A*, 2016, **4**, 6561-6568.
- [2] B. W. Xiao, J. Liu, Q. Sun, B. Q. Wang, M. N. Banis, D. Zhao, Z. Q. Wang, R. Y. Li, X. Y. Cui, T. -K. Sham and X. L. Sun, Unravelling the Role of Electrochemically Active FePO<sub>4</sub> Coating by Atomic Layer Deposition for Increased High-Voltage Stability of LiNi<sub>0.5</sub>Mn<sub>1.5</sub>O<sub>4</sub> Cathode Material, *Adv. Sci.*, 2015, **2**, 1500022.
- [3] X. W. Gao, Y. F. Deng, D. Wexler, G. H. Chen, S. L. Chou, H. K. Liu, Z. C. Shi and J. Z. Wang, Improving the electrochemical performance of the LiNi<sub>0.5</sub>Mn<sub>1.5</sub>O<sub>4</sub> spinel by polypyrrole coating as a cathode material for the lithium-ion battery, *J. Mater. Chem. A*, 2015, **3**, 404-411.
- [4] G. Wang, W. C. Wen, S. H. Chen, R. Z. Yu, X. Y. Wang and X. K. Yang, Improving the electrochemical performances of spherical LiNi<sub>0.5</sub>Mn<sub>1.5</sub>O<sub>4</sub>, by Fe<sub>2</sub>O<sub>3</sub>, surface coating for lithium-ion batteries, *Electrochim. Acta*, 2016, **212**, 791-799.
- [5] J. W. Kim, D. H. Kim, D. Y. Oh, H. Lee, J. H. Kim, J. H. Lee and Y. S. Jung, Surface chemistry of LiNi<sub>0.5</sub>Mn<sub>1.5</sub>O<sub>4</sub>, particles coated by Al<sub>2</sub>O<sub>3</sub> using atomic layer deposition for lithium-ion batteries, *J. Power Sources*, 2015, **274**, 1254-1262.
- [6] M. S. Song, D. S. Kim, E. Park, J. M. Choi and H. Kim, Simultaneous fluorination of active material and conductive agent for improving the electrochemical performance of LiNi<sub>0.5</sub>Mn<sub>1.5</sub>O<sub>4</sub> electrode for lithium-ion batteries, *J. Power Sources*, 2016, **326**, 156-161.
- [7] J. Chong, J. P. Zhang, H. M. Xie, X. Y. Song, G. Liu, V. Battaglia, S. D. Xun and R. S. Wang, High performance LiNi<sub>0.5</sub>Mn<sub>1.5</sub>O<sub>4</sub> cathode material with a bi-functional coating for lithium ion batteries, *RSC Adv.*, 2016, **6**, 19245-19251.
- [8] C. Q. Du, M. Yang, J. Liu, S. T. Sun, Z. Y. Tang, D. Y. Qu and X. H. Zhang, Surface modification of LiNi<sub>0.5</sub>Mn<sub>1.5</sub>O<sub>4</sub> cathode with lithium boron oxide glass for lithium-ion batteries, *RSC Adv.*, 2015, **5**, 57293-57299.
- [9] D. Hong, Y. F. Guo, H. X. Wang, J. G. Zhou and H. -T. Fang, Mechanism for improving the cycle performance of LiNi<sub>0.5</sub>Mn<sub>1.5</sub>O<sub>4</sub> by RuO<sub>2</sub> surface modification and increasing discharge cut-off potentials, *J. Mater. Chem. A*, 2015, **3**, 15457-15465.
- [10] A. Perea, K. Zaghbi and D. Be'langer, Characterization of LiNi<sub>0.5</sub>Mn<sub>1.5</sub>O<sub>4</sub> spinel electrode in the presence of 1,3,5-trihydroxybenzene as additive, *J. Mater. Chem. A*, 2015, **3**, 2776-2783.
- [11] M. Sachs, M. Gellert, M. Chen, H. -J. Drescher, S. R. Kachel, H. Zhou, M. Zugermeier, M. Gorgoi, B. Roling and J. Michael Gottfried, LiNi<sub>0.5</sub>Mn<sub>1.5</sub>O<sub>4</sub> high-voltage cathode coated with Li<sub>4</sub>Ti<sub>5</sub>O<sub>12</sub>: a hard X-ray photoelectron spectroscopy (HAXPES) study, *Phys. Chem. Chem. Phys.*, 2015, **17**, 31790-31800.
- [12] P. Sun, Y. Ma, T. Y. Zhai and H. Q. Li, High performance LiNi<sub>0.5</sub>Mn<sub>1.5</sub>O<sub>4</sub> cathode by Al-coating and Al<sup>3+</sup>-doping through a physical vapor deposition method, *Electrochim. Acta*, 2016, **191**, 237-246.

- [13] H. L. Wang, Z. Q. Shi, J. W. Li, S. Yang, R. B. Ren, J. Y. Cui, J. L. Xiao and B. Zhang, Direct carbon coating at high temperature on  $\text{LiNi}_{0.5}\text{Mn}_{1.5}\text{O}_4$  cathode: Unexpected influence on crystal structure and electrochemical performances, *J. Power Sources*, 2015, **288**, 206-213.
- [14] J. Wang, S. Z. Yao, W. Q. Lin, B. H. Wu, X. Y. He, J. Y. Li and J. B. Zhao, Improving the electrochemical properties of high-voltage lithium nickel manganese oxide by surface coating with vanadium oxides for lithium ion batteries, *J. Power Sources*, 2015, **280**, 114-124.
- [15] Q. Wu, Y. F. Yin, S. W. Sun, X. P. Zhang, N. Wan and Y. Bai, Novel  $\text{AlF}_3$  surface modified spinel  $\text{LiMn}_{1.5}\text{Ni}_{0.5}\text{O}_4$ , for lithium-ion batteries: performance characterization and mechanism exploration, *Electrochim. Acta*, 2015, **158**, 73-80.
- [16] Q. Wu, X. P. Zhang, S. W. Sun, N. Wan, D. Pan, Y. Bai, H. Y. Zhu, Y. -S. Hu and S. Dai, Improved electrochemical performance of spinel  $\text{LiMn}_{1.5}\text{Ni}_{0.5}\text{O}_4$  through  $\text{MgF}_2$  nano-coating, *Nanoscale*, 2015, **7**, 15609-15617.
- [17] Q. T. Zhang, J. T. Mei, X. M. Wang, F. L. Tang, W. F. Fan and W. J. Lu, High performance spinel  $\text{LiNi}_{0.5}\text{Mn}_{1.5}\text{O}_4$  cathode material by lithium polyacrylate coating for lithium ion battery, *Electrochim. Acta*, 2014, **143**, 265-271.
